# Supplementary material for: Photo-polymerization-induced tightened domain enhancing the room-temperature phosphorescence emission
Source: Royal Society of Chemistry journal article supplement (doi:10.1039/d4tc02005g), 2024-01-01
Supplement: d4tc02005g1.pdf [file d4tc02005g1.pdf]

## Supporting Information

### Photo-Polymerization Induced Tightened Domain Enhancing the Room-Temperature Phosphorescence Emission

Cheng Yuan,<sup>1,‡</sup> Sang Yup Lee,<sup>2,‡</sup> Jingyuan Huang,<sup>3,‡</sup> Yong Ho Cho,<sup>3,‡</sup> Dong June Ahn<sup>2,3,\*</sup>, Chunzhi Cui<sup>1,\*</sup>

<sup>1</sup>Department of Chemistry, Yanbian University, Yanji 133002, China

<sup>2</sup>KU-KIST Graduate School of Converging Science and Technology, Korea University, Seoul 02841, Korea

<sup>3</sup>Department of Chemical and Biological Engineering, Korea University, Seoul 02841, Korea

**KEYWORDS:** Room Temperature Phosphorescence, Photo-Polymerization, Polydiacetylene

<sup>1</sup>H NMR and <sup>13</sup>C NMR spectra of CZEO-PCDA monomers:

<sup>1</sup>H NMR (300 MHz, CDCl<sub>3</sub>) δ 8.03(d, *J*=7.8 Hz, 2H), δ 7.40(m, 4H), δ 7.21(d, *J*=6.1, 1.7 Hz, 2H), δ 4.50 (t, *J*=5.6 Hz, 2H), δ 4.40(t, *J*=5.6 Hz, 2H), δ 2.19(m, 6H), δ 1.41(m, 8H), δ 1.14(d, *J*=22.9 Hz, 24H), δ 0.88(t, *J*=6.6 Hz 3H).

<sup>13</sup>C NMR (75 MHz, CDCl<sub>3</sub>) δ 173.64, 140.44, 125.79, 123.05, 120.40, 119.27, 108.58, 65.02, 61.98, 41.70, 34.09, 31.94, 29.33, 28.63, 24.62, 22.71, 19.23, 14.15.

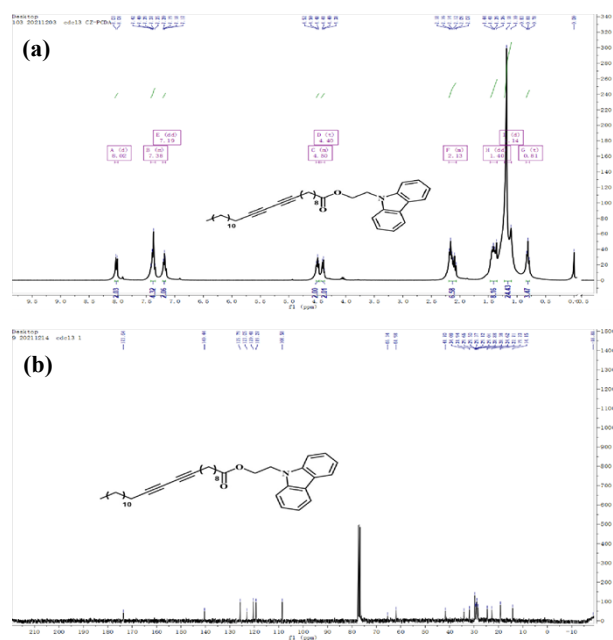

Figure S1. (a) <sup>1</sup>H NMR and (b) <sup>13</sup>C NMR spectra of CZEO-PCDA monomers.



$^1\text{H}$  NMR spectra of  $\text{Br}_2\text{-CZEO}$ ,  $\text{Br}_2\text{-CZEO-PCDA}$  monomers and  $^{13}\text{C}$  NMR spectra of  $\text{Br}_2\text{-CZEO-PCDA}$  monomers.

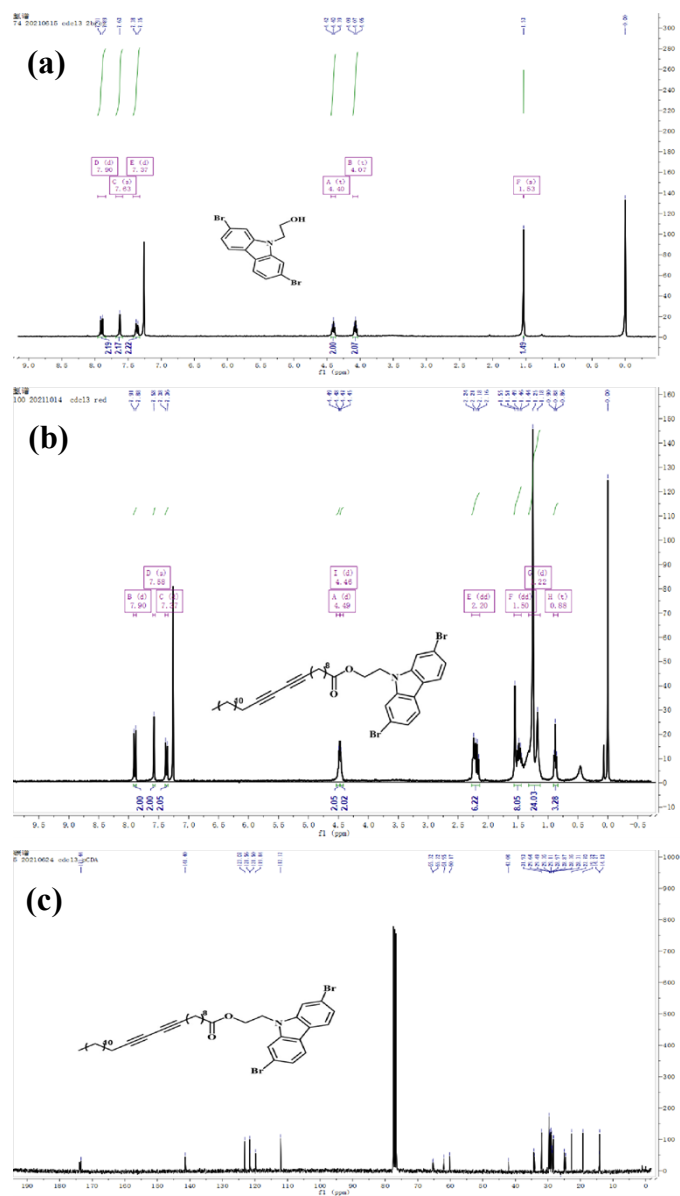

Figure S3.  $^1\text{H}$  NMR spectra of (a)  $\text{Br}_2\text{-CZEO}$  and (b)  $\text{Br}_2\text{-CZEO-PCDA}$  monomers. (c)  $^{13}\text{C}$  NMR spectra of  $\text{Br}_2\text{-CZEO-PCDA}$  monomers.

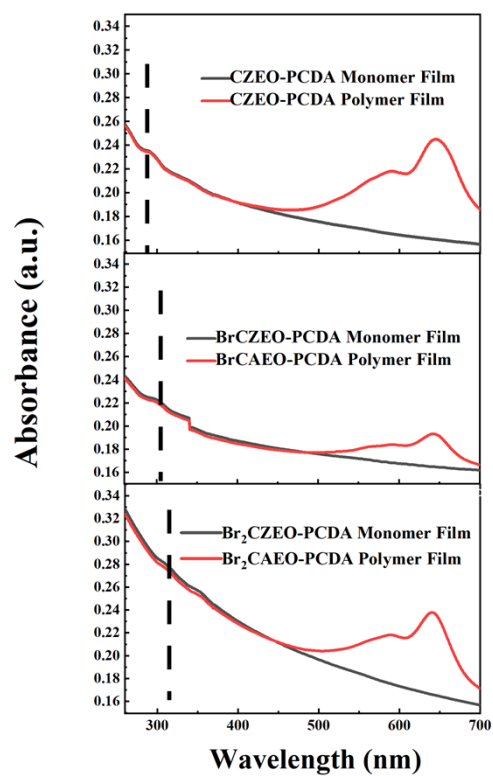

Figure S4. Absorption spectra of CZEOPCDA/PCDA, Br-CZEOPCDA/PCDA and Br<sub>2</sub>-CZEOPCDA/PCDA assemblies before (black line) and after (red line) UV-irradiation. Dash line means absorption peak position of the CZEOPCDA, Br-CZEOPCDA and Br<sub>2</sub>-CZEOPCDA units.

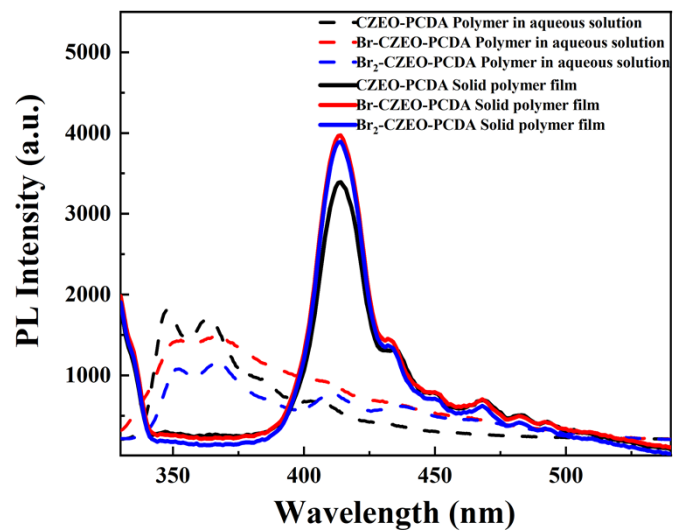

Figure S5. Emission spectra CZEO-PCDA/PCDA, Br-CZEO-PCDA/PCDA and Br<sub>2</sub>-CZEO-PCDA/PCDA assemblies dispersed in aqueous solution (dash lines) and casted on glass substrates (solid line) upon UV-irradiation.

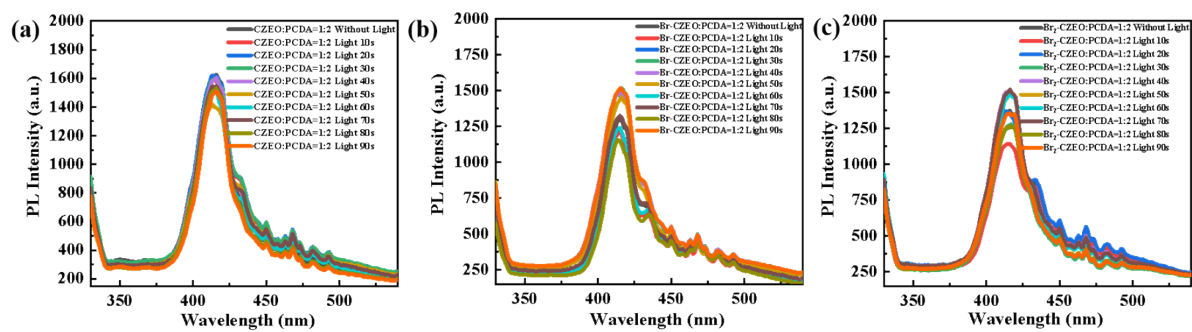

Figure S6. Emission spectra of CZEO, Br-CZEO and Br<sub>2</sub>-CZEO molecules mixed with PCDA monomers as a molar ratio of 1:2 and exposed on UV-irradiation for various time.

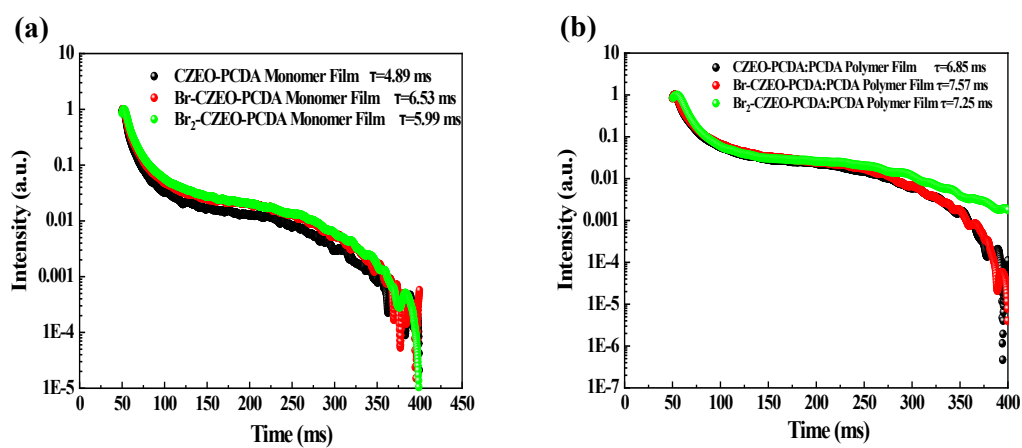

Figure S7. The room temperature phosphorescence (RTP) decay of the (a) monomeric and (b) UV irradiated CZEO-PCDA/PCDA, Br-CZEO-PCDA/PCDA and Br<sub>2</sub>-CZEO-PCDA/PCDA assemblies.
